# Supplementary material
Source: PubMed Central journal article supplement (PMC4815633)
Supplement: hdy201489x1.pdf [file hdy201489x1.pdf]

**Table S1.** Description of *Arabidopsis thaliana* populations from the Swiss Alps.

| Abbreviation | Altitude | Nearest locality (canton) | Latitude   | Longitude | Site description  | No. families measured                    |                                 |
|--------------|----------|---------------------------|------------|-----------|-------------------|------------------------------------------|---------------------------------|
|              |          |                           |            |           |                   | Growth and phenology (V/NV) <sup>a</sup> | Leaf traits (V/NV) <sup>a</sup> |
| BRI          | 800      | Bristen (Uri)             | 46.767143° | 8.703281° | ruderal site      | 14/14                                    | 10/10                           |
| NAT          | 850      | Naters (Valais)           | 46.332219° | 7.986673° | stone wall        | 14/14                                    | 10/9                            |
| EGG          | 900      | Eggerberg (Valais)        | 46.313080° | 7.877429° | rock ledge        | 14/12                                    | 11/10                           |
| AUS          | 1000     | Ausserberg (Valais)       | 46.314011° | 7.866921° | next to path      | 14/14                                    | 10/10                           |
| GEI          | 1030     | Geimen (Valais)           | 46.340921° | 7.984058° | stone wall        | 8/8                                      | 8/8                             |
| RI1          | 1360     | Ritzingen (Valais)        | 46.460378° | 8.226022° | meadow/pasture    | 14/14                                    | 11/11                           |
| RI2          | 1368     | Ritzingen (Valais)        | 46.460996° | 8.226356° | meadow/pasture    | 12/12                                    | 10/10                           |
| BI2          | 1719     | Bielen (Valais)           | 46.111142° | 7.934575° | rocky outcrop     | 14/14                                    | 10/9                            |
| BI1          | 1730     | Bielen (Valais)           | 46.110730° | 7.934378° | alpine meadow     | 14/14                                    | 10/10                           |
| SAF          | 1792     | Saas Fee (Valais)         | 46.109267° | 7.929501° | in village        | 14/14                                    | 10/10                           |
| GRA          | 1850     | Grächen (Valais)          | 46.163273° | 7.836735° | landslide flank   | 14/14                                    | 10/10                           |
| BAE          | 1949     | Bärenfalle (Valais)       | 46.123995° | 7.926905° | cow pasture       | 10/10                                    | 10/10                           |
| SAO          | 2012     | Ofne (Valais)             | 46.105627° | 7.909708° | rocky slope       | 13/13                                    | 10/10                           |
| ZIN          | 2700     | Zinal (Valais)            | 46.146692° | 7.645714° | ibex resting site | 14/14                                    | 10/10                           |

<sup>a</sup> for vernalized (V) and non-vernalized conditions (NV)

—
