# Supplementary material
Source: PubMed Central journal article supplement (PMC4815633)
Supplement: hdy201489x3.pdf [file hdy201489x3.pdf]

**Table S3.** Pair-wise  $F_{ST}$  between 14 populations of *Arabidopsis thaliana* collected from the Swiss Alps at altitudes of 800-2700 m a.s.l.; population names refer to those in Table S2, altitudes are given in parentheses.

|            | BRI<br>(800) | NAT<br>(850) | EGG<br>(900) | AUS<br>(1000) | GEI<br>(1030) | RI1<br>(1360) | RI2<br>(1368) | BI1<br>(1719) | BI2<br>(1730) | SAF<br>(1792) | GRA<br>(1850) | BAE<br>(1949) | SAO<br>(2012) |
|------------|--------------|--------------|--------------|---------------|---------------|---------------|---------------|---------------|---------------|---------------|---------------|---------------|---------------|
| NAT (850)  | 0.7556       |              |              |               |               |               |               |               |               |               |               |               |               |
| EGG (900)  | 0.5463       | 0.6018       |              |               |               |               |               |               |               |               |               |               |               |
| AUS (1000) | 0.7341       | 0.783        | 0.5054       |               |               |               |               |               |               |               |               |               |               |
| GEI (1030) | 0.8188       | 0.8123       | 0.5736       | 0.823         |               |               |               |               |               |               |               |               |               |
| RI1 (1360) | 0.8007       | 0.8757       | 0.6212       | 0.8402        | 0.9561        |               |               |               |               |               |               |               |               |
| RI2 (1368) | 0.5529       | 0.6571       | 0.3861       | 0.5541        | 0.6417        | 0.4761        |               |               |               |               |               |               |               |
| BI1 (1719) | 0.8638       | 0.8954       | 0.6732       | 0.8856        | 0.9748        | 0.955         | 0.7472        |               |               |               |               |               |               |
| BI2 (1730) | 0.8219       | 0.8698       | 0.6541       | 0.8483        | 0.9233        | 0.9138        | 0.7106        | 0.9166        |               |               |               |               |               |
| SAF (1792) | 0.6613       | 0.7033       | 0.4895       | 0.6509        | 0.7329        | 0.7374        | 0.5254        | 0.6711        | 0.6568        |               |               |               |               |
| GRA (1850) | 0.7109       | 0.7656       | 0.5507       | 0.7494        | 0.8304        | 0.8465        | 0.614         | 0.8529        | 0.8125        | 0.6066        |               |               |               |
| BAE (1949) | 0.6212       | 0.721        | 0.4217       | 0.6561        | 0.7515        | 0.7653        | 0.446         | 0.7768        | 0.703         | 0.4521        | 0.6081        |               |               |
| SAO (2012) | 0.7059       | 0.7587       | 0.5147       | 0.6983        | 0.8079        | 0.8198        | 0.5508        | 0.8064        | 0.7952        | 0.5627        | 0.6781        | 0.5411        |               |
| ZIN (2700) | 0.8271       | 0.8806       | 0.6552       | 0.871         | 0.9633        | 0.947         | 0.7571        | 0.9477        | 0.9146        | 0.7305        | 0.8241        | 0.7824        | 0.8126        |
