# Supplementary material
Source: PubMed Central journal article supplement (PMC4815633)
Supplement: hdy201489x4.pdf [file hdy201489x4.pdf]

**Table S4.** Mixed model analysis of the effect of vernalization, population differences and their interaction effects (Vern. x Pop.) on growth, phenology and leaf traits in 14 *Arabidopsis thaliana* populations from the Swiss Alps that were grown in a greenhouse; the models included family (genotype) identity as a random effect. RDV, rosette diameter after three weeks; RLN, rosette leaf number after three weeks; DTF, days to flowering (flowers open); RDF, rosette diameter at flowering, LFA, leaf area; SLA, specific leaf area; SUC, leaf succulence.

| Traits | Vernalization (nom.df <sup>a</sup> =1) |                         |                       | Population (nom. df <sup>a</sup> =13) |                      |                       | Vern. x Pop. (nom.df <sup>a</sup> =13) |                       |                       |
|--------|----------------------------------------|-------------------------|-----------------------|---------------------------------------|----------------------|-----------------------|----------------------------------------|-----------------------|-----------------------|
|        | F                                      | P                       | denom.df <sup>b</sup> | F                                     | P                    | denom.df <sup>b</sup> | F                                      | P                     | denom.df <sup>b</sup> |
| RDV    | 24.5                                   | 8.6 * 10 <sup>-07</sup> | 1167                  | 22.5                                  | <1*10 <sup>-14</sup> | 169                   | 4.062                                  | 1.41*10 <sup>-6</sup> | 1167                  |
| RLN    | 13.8                                   | 0.0002                  | 1167                  | 44.7                                  | <1*10 <sup>-14</sup> | 169                   | 5.382                                  | 1.67*10 <sup>-9</sup> | 1167                  |
| DTF    | 5899                                   | <1*10 <sup>-14</sup>    | 1166                  | 69.8                                  | <1*10 <sup>-14</sup> | 169                   | 28.3                                   | <1*10 <sup>-14</sup>  | 1166                  |
| RDF    | 1724                                   | <1*10 <sup>-14</sup>    | 1167                  | 57.9                                  | <1*10 <sup>-14</sup> | 169                   | 40.7                                   | <1*10 <sup>-14</sup>  | 1167                  |
| LFA    | 3.037                                  | 0.0820                  | 540                   | 18.7                                  | <1*10 <sup>-14</sup> | 127                   | 5.513                                  | 1.90*10 <sup>-9</sup> | 540                   |
| SLA    | 378                                    | <1*10 <sup>-14</sup>    | 540                   | 24.9                                  | <1*10 <sup>-14</sup> | 127                   | 7.947                                  | 1.24*10 <sup>-9</sup> | 540                   |
| SUC    | 233                                    | <1*10 <sup>-14</sup>    | 532                   | 51.6                                  | <1*10 <sup>-14</sup> | 127                   | 14.7                                   | <1*10 <sup>-14</sup>  | 532                   |

<sup>a</sup> nominator df, <sup>b</sup> denominator df
