# Supplementary material
Source: PubMed Central journal article supplement (PMC4815633)
Supplement: hdy201489x5.pdf [file hdy201489x5.pdf]

**Table S5.** Correlations between population means for growth, phenology and leaf traits of 14 *Arabidopsis thaliana* populations from the Swiss Alps grown in a greenhouse between traits expressed with and without vernalization (across vern. treatm.), as well as within vernalized and non-vernalized plants. *r*, Pearson correlation coefficient; bold type, significant after correction for multiple comparisons; italic type, P-Value < 0.05. RDV, rosette diameter after three weeks; RLN, rosette leaf number after three weeks; DTF, days to flowering (flowers open); RDF, rosette diameter at flowering, LFA, leaf area; SLA, specific leaf area; SUC, leaf succulence.

|     |          | across vern.                  | Vernalized    |        |               |               |               | Non-vernalized               |               |               |               |               |        |               |
|-----|----------|-------------------------------|---------------|--------|---------------|---------------|---------------|------------------------------|---------------|---------------|---------------|---------------|--------|---------------|
|     |          | treatm.                       | RDV           | RLN    | DTF           | RDF           | LFA           | SLA                          | RDV           | RLN           | DTF           | RDF           | LFA    | SLA           |
| RDV | <i>r</i> | <b>0.86</b>                   |               |        |               |               |               |                              |               |               |               |               |        |               |
|     | <i>P</i> | <i>7.8 * 10<sup>-5</sup></i>  |               |        |               |               |               |                              |               |               |               |               |        |               |
| RLN | <i>r</i> | <b>0.90</b>                   | <b>0.73</b>   |        |               |               |               |                              | <i>0.643</i>  |               |               |               |        |               |
|     | <i>P</i> | <i>1.4 * 10<sup>-5</sup></i>  | <b>0.0033</b> |        |               |               |               |                              | <i>0.0131</i> |               |               |               |        |               |
| DTF | <i>r</i> | <b>0.87</b>                   | -0.26         | -0.30  |               |               |               |                              | -0.41         | -0.27         |               |               |        |               |
|     | <i>P</i> | <i>4.7 * 10<sup>-5</sup></i>  | 0.3677        | 0.2910 |               |               |               |                              | 0.1501        | 0.3499        |               |               |        |               |
| RDF | <i>r</i> | <b>0.88</b>                   | 0.24          | 0.17   | <b>-0.82</b>  |               |               |                              | 0.31          | -0.07         | <i>-0.62</i>  |               |        |               |
|     | <i>P</i> | <i>3.5 * 10<sup>-5</sup></i>  | 0.4147        | 0.5634 | <b>0.0003</b> |               |               |                              | 0.2747        | 0.8226        | <i>0.0184</i> |               |        |               |
| LFA | <i>r</i> | <b>0.66</b>                   | 0.12          | 0.00   | <i>-0.54</i>  | <b>0.78</b>   |               |                              | 0.33          | -0.13         | -0.31         | <i>0.55</i>   |        |               |
|     | <i>P</i> | <b>0.0104</b>                 | 0.6791        | 0.9998 | <i>0.0480</i> | <b>0.0009</b> |               |                              | 0.2432        | 0.6636        | 0.2827        | <i>0.0418</i> |        |               |
| SLA | <i>r</i> | <b>0.90</b>                   | 0.16          | 0.26   | <b>0.74</b>   | <b>-0.72</b>  | <b>-0.62</b>  |                              | -0.14         | 0.45          | <i>0.54</i>   | <i>-0.64</i>  | -0.37  |               |
|     | <i>P</i> | <i>1.56 * 10<sup>-5</sup></i> | 0.5843        | 0.3776 | <b>0.0025</b> | <b>0.0039</b> | <b>0.0185</b> |                              | 0.6365        | 0.1075        | <i>0.0462</i> | <i>0.0140</i> | 0.1934 |               |
| SUC | <i>r</i> | <b>0.89</b>                   | 0.34          | 0.42   | <i>0.57</i>   | <b>-0.69</b>  | <b>-0.62</b>  | <b>0.90</b>                  | 0.33          | <i>0.65</i>   | 0.12          | -0.21         | 0.20   | <i>0.68</i>   |
|     | <i>P</i> | <i>2.13 * 10<sup>-5</sup></i> | 0.2380        | 0.1306 | <i>0.0327</i> | <b>0.0064</b> | <b>0.0186</b> | <i>3.5 * 10<sup>-5</sup></i> | 0.2548        | <i>0.0125</i> | 0.6939        | 0.4618        | 0.4896 | <i>0.0077</i> |
