# Supplementary material
Source: PubMed Central journal article supplement (PMC4815633)
Supplement: hdy201489x6.pdf [file hdy201489x6.pdf]

**Table S6.** Overall broad-sense heritabilities ( $H^2$ ) with 95% confidence intervals (CI) of growth, phenology and leaf traits in *Arabidopsis thaliana* from 14 Swiss populations grown under in a greenhouse with and without vernalization. RDV, rosette diameter after three weeks; RLN, rosette leaf number after three weeks; DTF, days to flowering (flowers open); RDF, rosette diameter at flowering, LFA, leaf area; SLA, specific leaf area; SUC, leaf succulence.

| Trait | Vernalized |       |       | Non-vernalized |       |       |
|-------|------------|-------|-------|----------------|-------|-------|
|       | $H^2$      | CI    |       | $H^2$          | CI    |       |
| RDV   | 0.443      | 0.365 | 0.519 | 0.445          | 0.358 | 0.525 |
| RDF   | 0.829      | 0.791 | 0.861 | 0.558          | 0.474 | 0.628 |
| DTF   | 0.912      | 0.888 | 0.929 | 0.830          | 0.787 | 0.863 |
| RLN   | 0.450      | 0.368 | 0.520 | 0.485          | 0.401 | 0.564 |
| LFA   | 0.444      | 0.328 | 0.553 | 0.117          | 0.000 | 0.238 |
| SLA   | 0.473      | 0.353 | 0.582 | 0.306          | 0.173 | 0.419 |
| SUC   | 0.609      | 0.508 | 0.694 | 0.282          | 0.147 | 0.407 |
