# Supplementary material
Source: PubMed Central journal article supplement (PMC4815633)

**a**

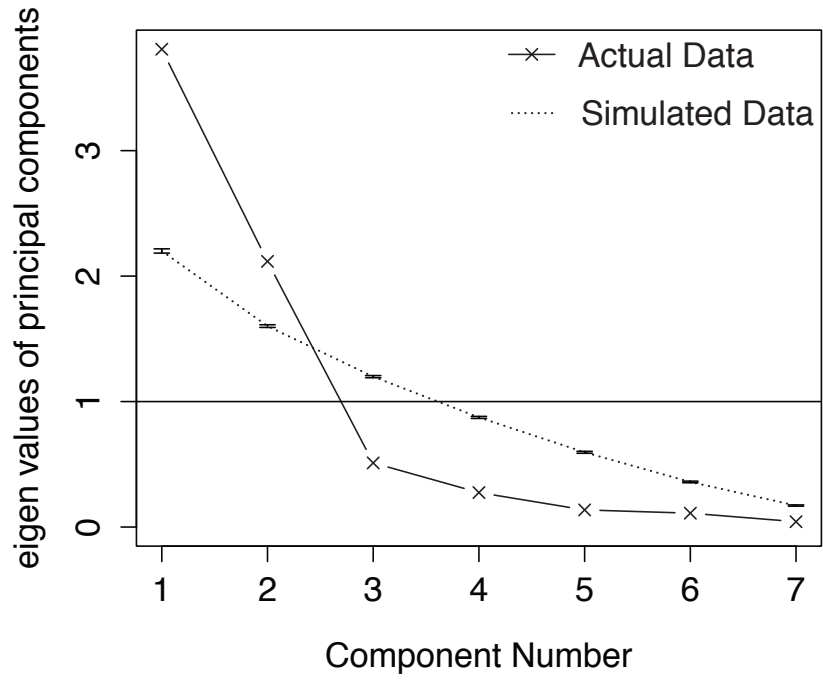

**b**

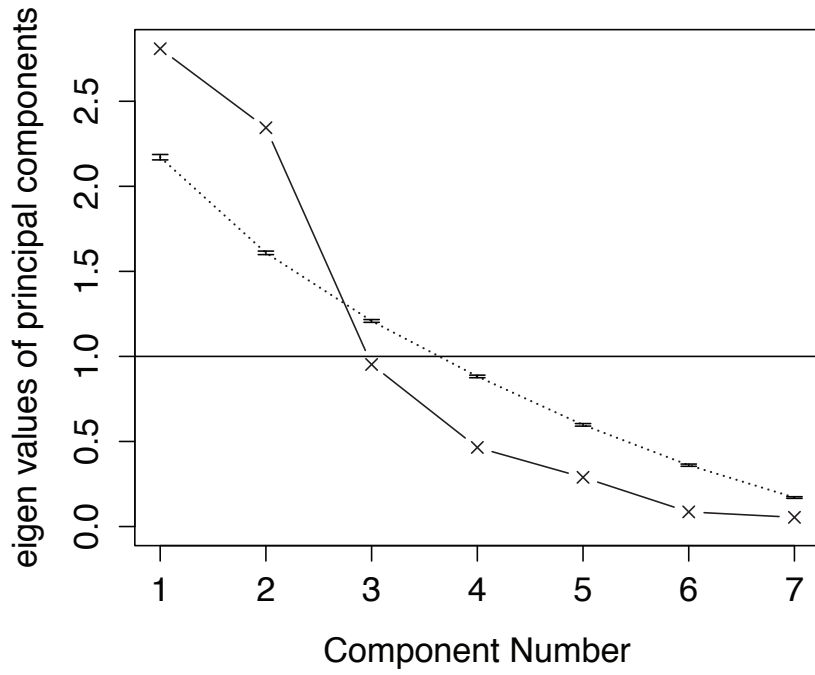

Supplement: hdy201489x10.pdf [file hdy201489x10.pdf]

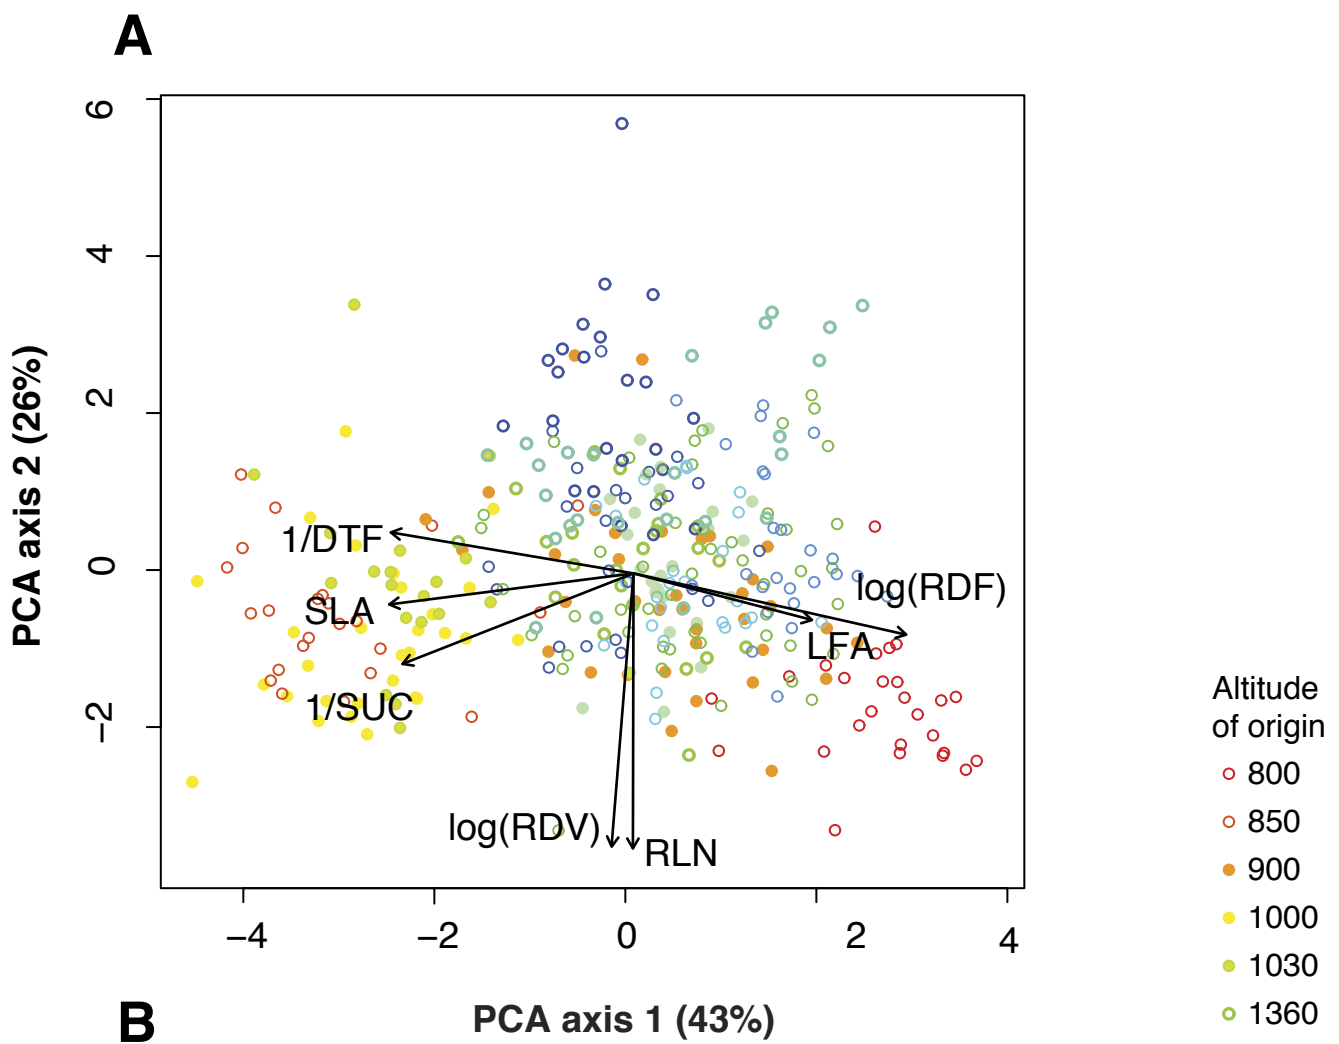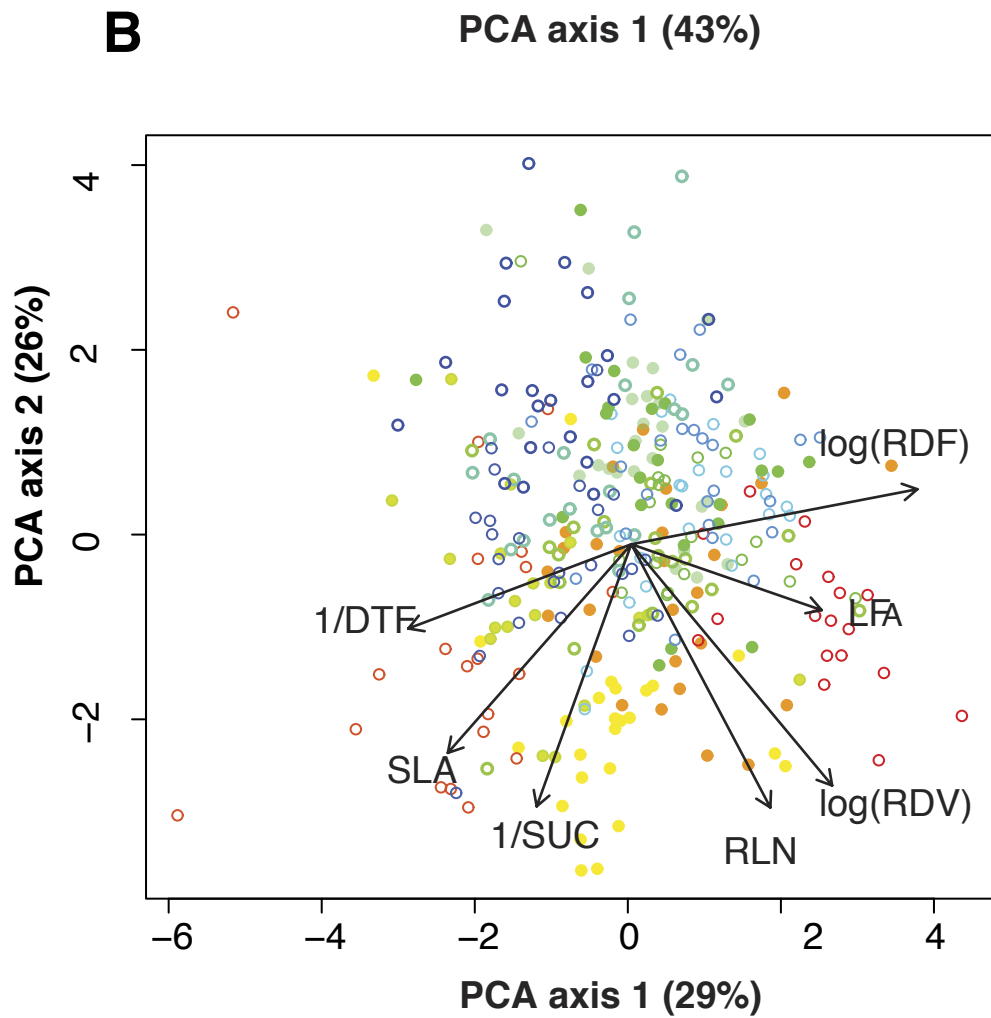

Supplement: hdy201489x11.pdf [file hdy201489x11.pdf]

**a**

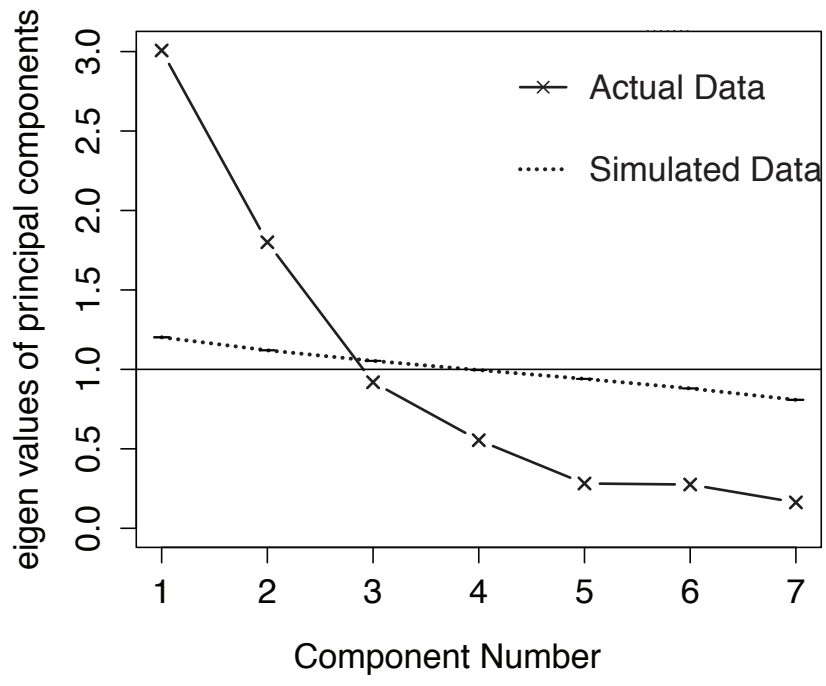

**b**

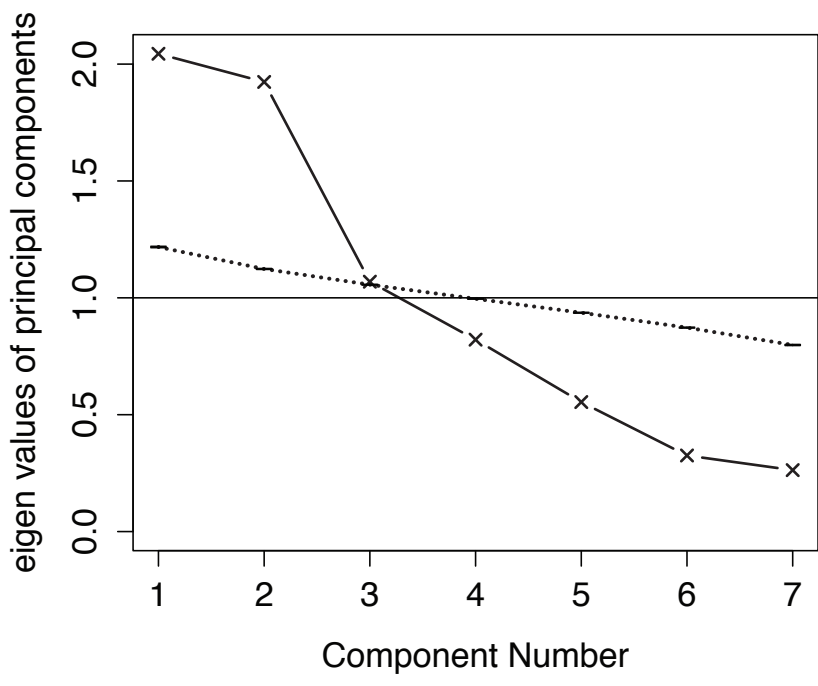

Supplement: hdy201489x12.pdf [file hdy201489x12.pdf]

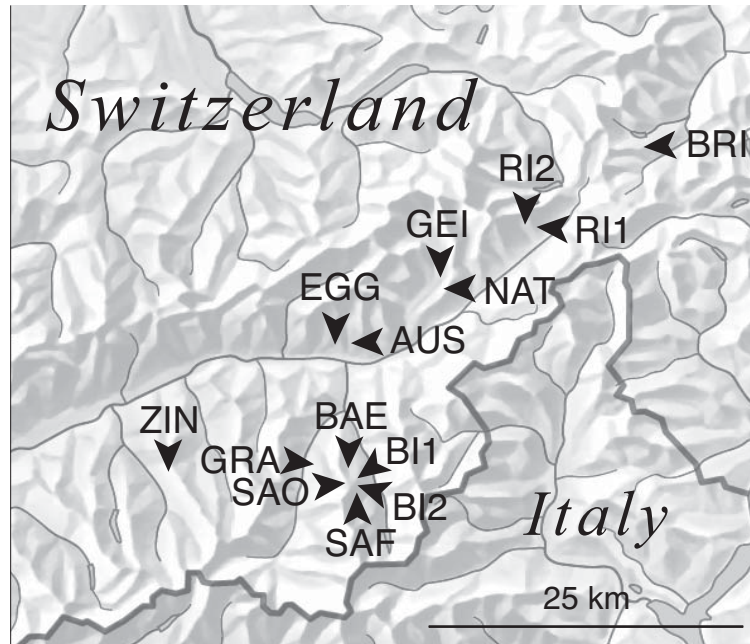

Supplement: hdy201489x7.pdf [file hdy201489x7.pdf]

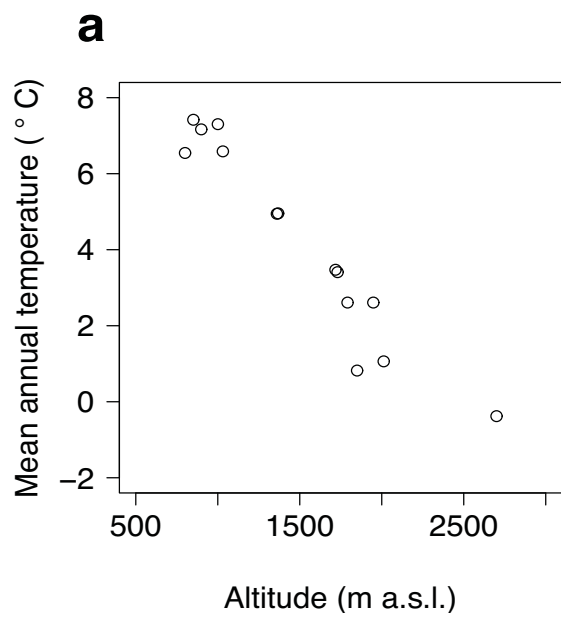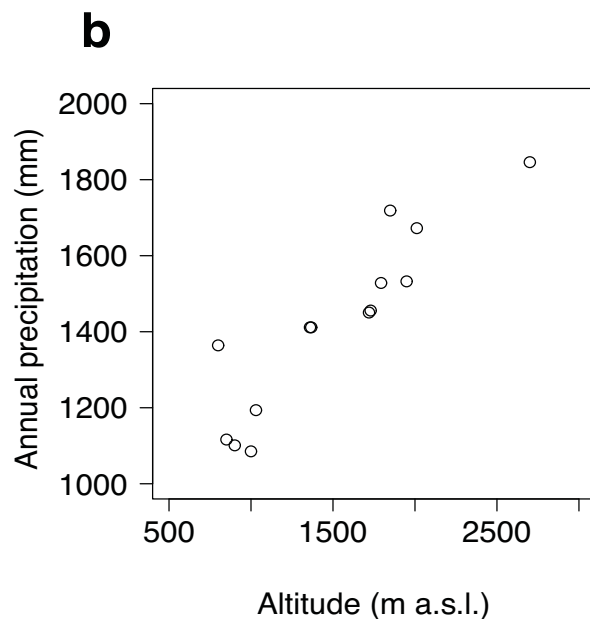

Supplement: hdy201489x8.pdf [file hdy201489x8.pdf]

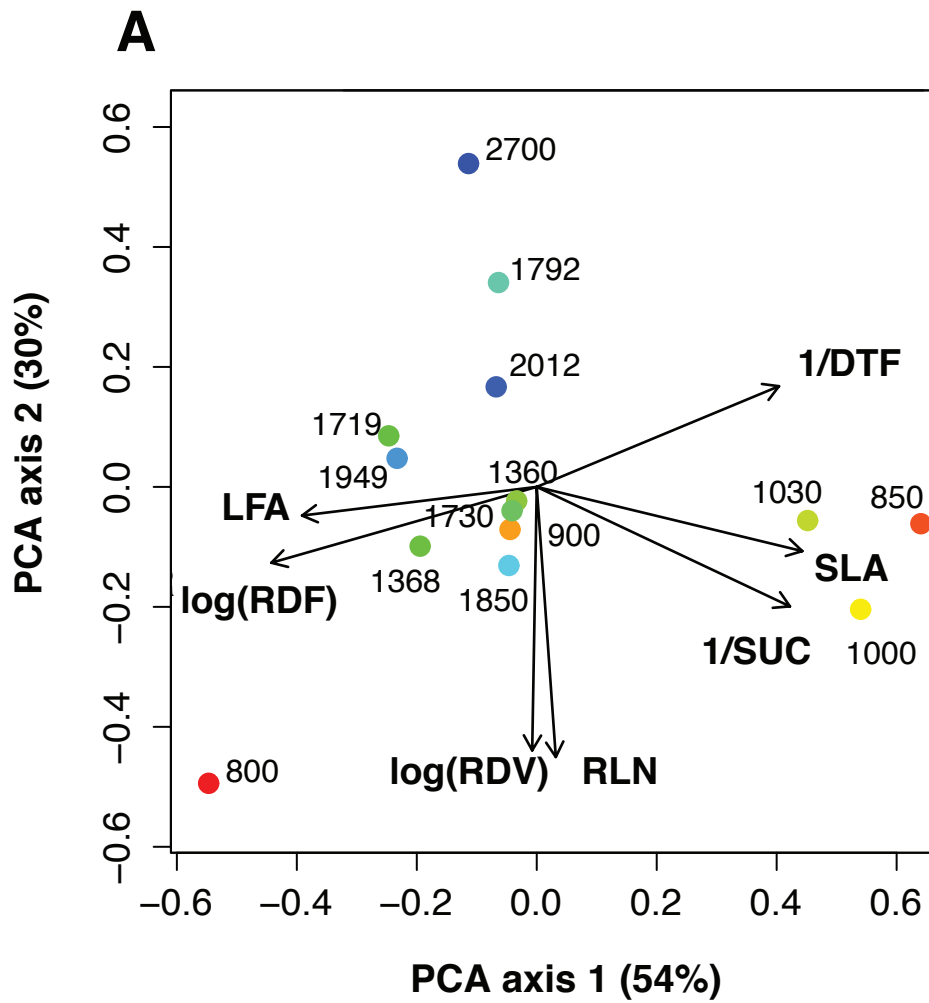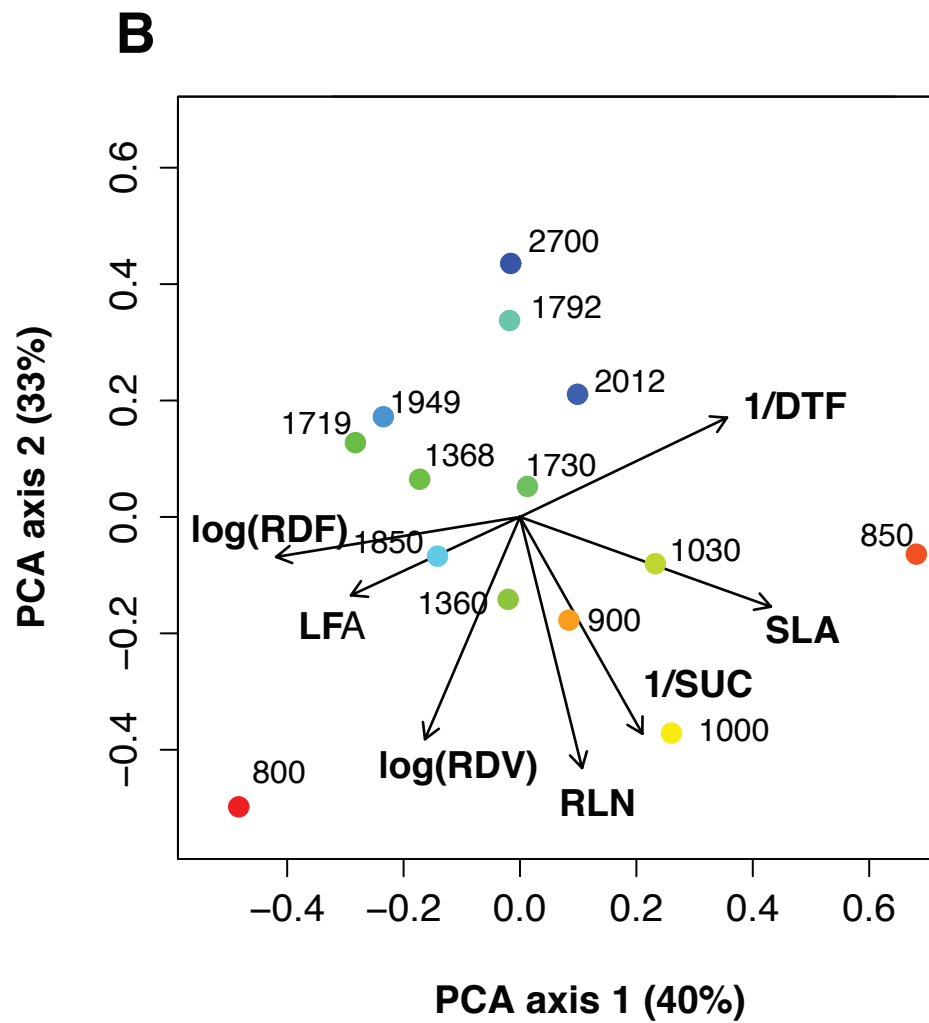

Supplement: hdy201489x9.pdf [file hdy201489x9.pdf]
